# Supplementary material for: Classical Morphometrics in V. arvensis and V. kitaibeliana (Viola sect. Melanium) Reveals Intraspecific Variation with Implications for Species Delimitation: Inferences from a Case Study in Central Italy
Source: MDPI journal article supplement (doi:10.3390/plants11030379), 2022-01-29
Supplement: s1 [file s1]

**Supplementary Material Table S1** - Pearson's correlation between pairwise combinations of 21 quantitative variables. Boldfaced values indicate significant correlation ( $r > 0,80$ ). See Table 2 in the text for abbreviations.

|          | SE_LE           | UPP_LE          | UPP_WI          | LAP_LE          | LAP_WI          | LAP_UPHA        | LAP_LOHA        | LOP_LE          | LOP_WI          | SP_LE           | SP_WI           | CO_LE           | CO_WI           |
|----------|-----------------|-----------------|-----------------|-----------------|-----------------|-----------------|-----------------|-----------------|-----------------|-----------------|-----------------|-----------------|-----------------|
| SE_LE    | <b>1.000000</b> |                 |                 |                 |                 |                 |                 |                 |                 |                 |                 |                 |                 |
| UPP_LE   | 0.795219        | <b>1.000000</b> |                 |                 |                 |                 |                 |                 |                 |                 |                 |                 |                 |
| UPP_WI   | 0.767889        | <b>0.971618</b> | <b>1.000000</b> |                 |                 |                 |                 |                 |                 |                 |                 |                 |                 |
| LAP_LE   | <b>0.824890</b> | <b>0.981928</b> | <b>0.963332</b> | <b>1.000000</b> |                 |                 |                 |                 |                 |                 |                 |                 |                 |
| LAP_WI   | 0.756892        | <b>0.969443</b> | <b>0.985303</b> | <b>0.966967</b> | <b>1.000000</b> |                 |                 |                 |                 |                 |                 |                 |                 |
| LAP_UPHA | <b>0.808676</b> | <b>0.986994</b> | <b>0.971336</b> | <b>0.990561</b> | <b>0.971895</b> | <b>1.000000</b> |                 |                 |                 |                 |                 |                 |                 |
| LAP_LOHA | 0.731746        | 0.776492        | 0.750060        | <b>0.847335</b> | 0.764862        | 0.766548        | <b>1.000000</b> |                 |                 |                 |                 |                 |                 |
| LOP_LE   | <b>0.852464</b> | <b>0.938389</b> | <b>0.924728</b> | <b>0.966415</b> | <b>0.923821</b> | <b>0.947655</b> | <b>0.856209</b> | <b>1.000000</b> |                 |                 |                 |                 |                 |
| LOP_WI   | 0.782906        | <b>0.966352</b> | <b>0.975605</b> | <b>0.972463</b> | <b>0.976917</b> | <b>0.974987</b> | 0.778695        | <b>0.954565</b> | <b>1.000000</b> |                 |                 |                 |                 |
| SP_LE    | <b>0.823939</b> | <b>0.857832</b> | <b>0.845770</b> | <b>0.889261</b> | <b>0.838314</b> | <b>0.860505</b> | <b>0.832223</b> | <b>0.949765</b> | <b>0.869099</b> | <b>1.000000</b> |                 |                 |                 |
| SP_WI    | 0.632454        | 0.708327        | 0.702917        | 0.761128        | 0.717932        | 0.705097        | <b>0.834188</b> | <b>0.825797</b> | 0.730204        | <b>0.848489</b> | <b>1.000000</b> |                 |                 |
| CO_LE    | <b>0.844230</b> | <b>0.959987</b> | <b>0.944325</b> | <b>0.950410</b> | <b>0.933111</b> | <b>0.961841</b> | 0.726518        | <b>0.927521</b> | <b>0.946516</b> | <b>0.842071</b> | 0.640834        | <b>1.000000</b> |                 |
| CO_WI    | <b>0.813392</b> | <b>0.959402</b> | <b>0.951032</b> | <b>0.941752</b> | <b>0.946074</b> | <b>0.957153</b> | 0.704026        | <b>0.903538</b> | <b>0.943662</b> | <b>0.819357</b> | 0.634373        | <b>0.973676</b> | <b>1.000000</b> |
| PED_LE   | <b>0.809610</b> | 0.757793        | 0.733517        | 0.786303        | 0.737861        | 0.779297        | 0.665004        | 0.799392        | 0.750765        | 0.753211        | 0.592770        | 0.787876        | 0.765058        |
| LA_LE    | <b>0.910518</b> | 0.762379        | 0.719208        | 0.784992        | 0.707114        | 0.783478        | 0.642385        | 0.799437        | 0.735926        | 0.751662        | 0.547085        | <b>0.801943</b> | 0.766992        |
| LA_WI    | 0.764290        | 0.648915        | 0.616444        | 0.690227        | 0.623496        | 0.677416        | 0.609626        | 0.712215        | 0.629883        | 0.661198        | 0.562662        | 0.684955        | 0.646976        |
| PET_LE   | 0.694826        | 0.584801        | 0.566393        | 0.612616        | 0.561263        | 0.592638        | 0.574667        | 0.625178        | 0.548203        | 0.582215        | 0.540178        | 0.620034        | 0.590957        |
| HALA_TE  | 0.781922        | 0.669602        | 0.645968        | 0.697077        | 0.634077        | 0.683963        | 0.616466        | 0.721653        | 0.657512        | 0.672482        | 0.521212        | 0.725607        | 0.688909        |
| ST_LE    | <b>0.864035</b> | 0.687312        | 0.659466        | 0.731144        | 0.652498        | 0.713099        | 0.662953        | 0.757931        | 0.668814        | 0.718621        | 0.595542        | 0.726028        | 0.690383        |
| ST_INLO  | 0.459071        | 0.283779        | 0.295344        | 0.306936        | 0.262087        | 0.295081        | 0.295648        | 0.305423        | 0.260307        | 0.278777        | 0.160939        | 0.340522        | 0.325402        |
| ST_EXLO  | 0.604879        | 0.465555        | 0.473884        | 0.510904        | 0.466558        | 0.480800        | 0.531179        | 0.522942        | 0.448998        | 0.505780        | 0.488584        | 0.459309        | 0.440938        |

|         | PED_LE          | LA_LE           | LA_WI           | PET_LE          | HALA_TE         | ST_LE           | ST_INLO         | ST_EXLO         |
|---------|-----------------|-----------------|-----------------|-----------------|-----------------|-----------------|-----------------|-----------------|
| PED_LE  | <b>1.000000</b> |                 |                 |                 |                 |                 |                 |                 |
| LA_LE   | <b>0.815623</b> | <b>1.000000</b> |                 |                 |                 |                 |                 |                 |
| LA_WI   | <b>0.805422</b> | <b>0.836973</b> | <b>1.000000</b> |                 |                 |                 |                 |                 |
| PET_LE  | 0.734056        | 0.724427        | <b>0.851118</b> | <b>1.000000</b> |                 |                 |                 |                 |
| HALA_TE | 0.715876        | 0.735742        | 0.784201        | 0.697990        | <b>1.000000</b> |                 |                 |                 |
| ST_LE   | <b>0.823382</b> | <b>0.914693</b> | <b>0.881803</b> | <b>0.859507</b> | 0.752632        | <b>1.000000</b> |                 |                 |
| ST_INLO | 0.325332        | 0.461816        | 0.417505        | 0.432877        | 0.464210        | 0.464862        | <b>1.000000</b> |                 |
| ST_EXLO | 0.536655        | 0.581793        | 0.610399        | 0.625615        | 0.568729        | 0.692398        | 0.589871        | <b>1.000000</b> |
