# Supplementary material for: Classical Morphometrics in V. arvensis and V. kitaibeliana (Viola sect. Melanium) Reveals Intraspecific Variation with Implications for Species Delimitation: Inferences from a Case Study in Central Italy
Source: MDPI journal article supplement (doi:10.3390/plants11030379), 2022-01-29
Supplement: s1 [file s1]

**Supplementary Material Table S2** – The morphological features among the 14 investigated populations sorted per species. Abbreviation for populations as in Table 1 in the text.

| SM S2a - Quantitative characters in mm (as mean ± SD, with minimum-maximum values in brackets) |                               |                               |                              |                             |                              |                            |                            |                            |                               |                              |                            |                            |                              |                               |                              |                                 |                              |                                |                          |                               |                               |
|------------------------------------------------------------------------------------------------|-------------------------------|-------------------------------|------------------------------|-----------------------------|------------------------------|----------------------------|----------------------------|----------------------------|-------------------------------|------------------------------|----------------------------|----------------------------|------------------------------|-------------------------------|------------------------------|---------------------------------|------------------------------|--------------------------------|--------------------------|-------------------------------|-------------------------------|
|                                                                                                | Continuous characters         |                               |                              |                             |                              |                            |                            |                            |                               |                              |                            |                            |                              |                               |                              |                                 |                              |                                | Discrete characters      |                               |                               |
|                                                                                                | Corolla length                | Corolla width                 | Upper petal length           | Upper petal width           | Lateral petal length         | Lateral petal width        | Lateral petal upper half   | Lateral petal lower half   | Lower petal length            | Lower petal width            | Spur length                | Spur width                 | Lower sepal length           | Lamina length                 | Lamina width                 | Peduncle length                 | Petiole length               | Stipule length                 | Half lamina teeth number | Stipule external lobes number | Stipule internal lobes number |
| Code                                                                                           | CO_LE                         | CO_WI                         | UPP_LE                       | UPP_WI                      | LAP_LE                       | LAP_WI                     | LAP_UPHA                   | LAP_LOHA                   | LOP_LE                        | LOP_WI                       | SP_LE                      | SP_WI                      | SE_LE                        | LA_LE                         | LA_WI                        | PED_LE                          | PET_LE                       | ST_LE                          | HALA_TE                  | ST_EXLO                       | ST_INLO                       |
| VA-ST                                                                                          | 5.91 ± 1.15<br>(3.61-7.81)    | 4.93 ± 0.82<br>(3.69-6.75)    | 4.00 ± 0.73<br>(3.04-5.29)   | 2.26 ± 0.46<br>(1.56-3.28)  | 4.83 ± 0.82<br>(3.79-6.48)   | 2.48 ± 0.46<br>(1.88-3.55) | 2.53 ± 0.47<br>(1.90-3.45) | 2.30 ± 0.39<br>(1.82-3.04) | 8.24 ± 1.02<br>(7.20-10.48)   | 3.34 ± 0.55<br>(2.71-4.60)   | 2.56 ± 0.26<br>(2.21-3.14) | 1.55 ± 0.21<br>(1.20-1.91) | 5.68 ± 1.32<br>(3.73-8.19)   | 6.17 ± 2.28<br>(2.74-11.81)   | 3.83 ± 1.47<br>(1.80-7.41)   | 26.37 ± 5.66<br>(19.11-37.40)   | 4.91 ± 2.34<br>(2.10-10.63)  | 8.98 ± 3.64<br>(3.88-16.23)    | 2 ± 1<br>(1-3)           | 4 ± 1<br>(3-7)                | 1 ± 1<br>(1-2)                |
| VA-LA                                                                                          | 6.64 ± 1.09<br>(5.20-9.02)    | 5.43 ± 0.73<br>(4.64-6.96)    | 4.92 ± 0.59<br>(3.63-5.85)   | 2.59 ± 0.39<br>(1.94-3.24)  | 5.55 ± 0.54<br>(4.23-6.47)   | 2.64 ± 0.34<br>(2.15-3.25) | 3.12 ± 0.41<br>(2.25-3.89) | 2.42 ± 0.24<br>(1.98-2.95) | 8.90 ± 0.74<br>(7.60-10.76)   | 3.66 ± 0.42<br>(2.76-4.36)   | 2.60 ± 0.21<br>(2.28-3.28) | 1.61 ± 0.15<br>(1.40-1.95) | 6.84 ± 1.11<br>(5.63-8.61)   | 8.69 ± 3.85<br>(4.03-15.65)   | 2.91 ± 0.76<br>(1.96-4.77)   | 32.90 ± 8.44<br>(18.22-50.40)   | 4.35 ± 1.92<br>(2.37-8.60)   | 10.91 ± 3.88<br>(6.28-19.07)   | 2 ± 1<br>(1-2)           | 5 ± 1<br>(2-5)                | 2 ± 0<br>(1-2)                |
| VA-SCI                                                                                         | 6.07 ± 1.61<br>(3.24-8.99)    | 5.47 ± 1.10<br>(3.62-7.10)    | 4.63 ± 0.89<br>(3.44-6.55)   | 2.59 ± 0.63<br>(1.72-3.97)  | 5.23 ± 0.88<br>(4.05-7.15)   | 2.59 ± 0.50<br>(2.00-3.45) | 2.88 ± 0.56<br>(1.97-4.10) | 2.35 ± 0.42<br>(1.49-3.05) | 8.57 ± 1.29<br>(6.47-11.18)   | 3.49 ± 0.51<br>(2.76-4.59)   | 2.49 ± 0.50<br>(1.54-3.31) | 1.57 ± 0.26<br>(1.13-1.97) | 6.51 ± 1.63<br>(4.35-9.60)   | 6.11 ± 2.81<br>(2.65-11.44)   | 4.01 ± 1.19<br>(2.90-7.00)   | 25.71 ± 7.51<br>(13.90-41.03)   | 4.58 ± 2.35<br>(1.52-9.69)   | 9.70 ± 4.67<br>(4.21-17.79)    | 3 ± 1<br>(2-4)           | 4 ± 1<br>(3-8)                | 2 ± 1<br>(1-3)                |
| VA-TA                                                                                          | 7.16 ± 1.18<br>(4.58-9.24)    | 5.52 ± 0.68<br>(4.05-6.76)    | 4.01 ± 0.78<br>(2.63-5.55)   | 2.13 ± 0.44<br>(1.33-2.94)  | 4.67 ± 0.76<br>(3.32-6.16)   | 2.31 ± 0.41<br>(1.67-3.2)  | 2.45 ± 0.39<br>(1.70-3.17) | 2.21 ± 0.44<br>(1.47-2.99) | 8.13 ± 1.23<br>(5.89-10.56)   | 3.35 ± 0.60<br>(2.43-4.87)   | 2.42 ± 0.38<br>(1.50-3.02) | 1.46 ± 0.24<br>(0.93-1.89) | 6.04 ± 0.58<br>(4.79-7.13)   | 5.75 ± 1.67<br>(3.45-9.72)    | 3.41 ± 1.08<br>(1.89-5.68)   | 24.31 ± 4.75<br>(18.44-39.48)   | 4.28 ± 1.58<br>(2.25-9.17)   | 8.58 ± 2.40<br>(4.65-14.57)    | 3 ± 1<br>(1-4)           | 4 ± 1<br>(2-5)                | 2 ± 1<br>(1-2)                |
| VA-CE                                                                                          | 6.40 ± 0.90<br>(5.05-8.94)    | 4.81 ± 0.74<br>(3.84-6.09)    | 4.33 ± 0.60<br>(3.45-5.87)   | 2.29 ± 0.32<br>(1.78-2.80)  | 4.96 ± 0.52<br>(4.04-5.80)   | 2.46 ± 0.32<br>(1.87-3.01) | 2.53 ± 0.29<br>(2.06-3.04) | 2.43 ± 0.33<br>(1.81-3.02) | 8.73 ± 0.80<br>(7.18-9.87)    | 3.46 ± 0.39<br>(2.76-4.21)   | 2.50 ± 0.34<br>(1.89-3.04) | 1.52 ± 0.22<br>(1.01-1.78) | 6.62 ± 1.04<br>(4.60-8.41)   | 6.17 ± 2.47<br>(3.52-13.21)   | 4.51 ± 1.36<br>(2.93-7.82)   | 24.67 ± 6.74<br>(12.91-37.40)   | 5.52 ± 2.82<br>(2.79-13.65)  | 10.29 ± 5.06<br>(5.57-24.91)   | 3 ± 1<br>(2-4)           | 4 ± 1<br>(2-5)                | 1 ± 1<br>(1-2)                |
| VA-B/1                                                                                         | 15.13 ± 3.31<br>(10.27-21.52) | 10.95 ± 2.31<br>(7.37-15.72)  | 8.47 ± 2.01<br>(4.97-11.39)  | 5.34 ± 1.44<br>(2.75-7.73)  | 9.16 ± 1.42<br>(6.24-11.17)  | 4.85 ± 1.10<br>(2.99-6.57) | 6.13 ± 1.44<br>(3.51-8.32) | 3.03 ± 0.31<br>(2.41-3.53) | 15.28 ± 1.55<br>(12.27-17.64) | 7.89 ± 1.80<br>(5.31-11.66)  | 4.23 ± 0.39<br>(3.50-4.81) | 1.71 ± 0.26<br>(1.16-2.06) | 12.24±1.17<br>(10.49-15.34)  | 29.06 ± 7.37<br>(16.67-49.42) | 13.23 ± 6.13<br>(5.02-25.76) | 97.46 ±19.29<br>(62.94-133.25)  | 10.81 ± 6.54<br>(2.60-22.04) | 29.79 ± 10.46<br>(15.57-54.50) | 4 ± 1<br>(2-6)           | 5 ± 1<br>(4-8)                | 2 ± 1<br>(0-4)                |
| VA-B/2                                                                                         | 16.34 ± 2.18<br>(11.65-19.35) | 12.37 ± 2.36<br>(7.52-15.57)  | 9.29 ± 1.18<br>(6.25-10.93)  | 6.78 ± 1.14<br>(4.41-8.7)   | 9.77 ± 0.95<br>(7.63-11.54)  | 5.75 ± 0.72<br>(4.32-6.93) | 6.57 ± 0.82<br>(4.73-8.10) | 3.20 ± 0.24<br>(2.69-3.75) | 15.69 ± 1.35<br>(13.11-17.92) | 8.98 ± 1.17<br>(6.50-11.46)  | 4.15 ± 0.43<br>(3.38-5.03) | 1.99 ± 0.15<br>(1.65-2.25) | 10.89 ± 1.33<br>(8.96-13.25) | 17.39 ± 5.38<br>(9.88-31.33)  | 8.93 ± 2.12<br>(5.83-15.35)  | 61.71 ±16.69<br>(25.92-96.63)   | 10.49 ± 3.82<br>(3.54-18.26) | 23.15 ± 6.46<br>(7.84-34.32)   | 5 ± 1<br>(3-6)           | 6 ± 1<br>(3-9)                | 2 ± 1<br>(1-4)                |
| VA-BS                                                                                          | 14.12 ± 3.35<br>(9.24-21.52)  | 10.21 ± 3.31<br>(6.47-15.02)  | 7.89 ± 2.14<br>(5.32-11.64)  | 4.94 ± 1.52<br>(3.20-7.98)  | 8.63 ± 1.73<br>(6.58-11.87)  | 4.34 ± 1.39<br>(2.83-6.61) | 5.63 ± 1.60<br>(3.72-8.45) | 3.01 ± 0.29<br>(2.45-3.69) | 14.23 ± 1.27<br>(12.53-16.99) | 7.37 ± 1.98<br>(5.07-11.25)  | 3.61 ± 0.28<br>(3.08-3.95) | 1.69 ± 0.13<br>(1.40-2.07) | 10.69 ± 0.96<br>(9.64-12.89) | 23.49 ± 3.70<br>(16.69-31.83) | 10.98 ± 4.04<br>(5.61-21.96) | 57.89 ± 6.79<br>(50.45-72.83)   | 9.32 ± 3.36<br>(5.47-18.25)  | 23.74 ± 4.29<br>(16.77-33.64)  | 5 ± 1<br>(4-6)           | 6 ± 1<br>(4-7)                | 3 ± 0<br>(2-3)                |
| VA-AZ                                                                                          | 10.39 ± 1.70<br>(7.75-14.51)  | 7.68 ± 1.30<br>(5.69-10.89)   | 5.24 ± 0.82<br>(3.79-7.05)   | 2.96 ± 0.58<br>(4.47-2.17)  | 6.14 ± 1.06<br>(4.63-8.14)   | 2.96 ± 0.60<br>(2.00-4.49) | 3.61 ± 0.66<br>(2.74-5.07) | 2.53 ± 0.48<br>(1.80-3.29) | 10.64 ± 2.70<br>(7.26-14.89)  | 4.42 ± 1.20<br>(2.78-6.76)   | 2.95 ± 0.69<br>(2.00-4.19) | 1.42 ± 0.43<br>(0.86-2.29) | 11.12 ± 1.28<br>(8.74-14.37) | 19.98 ± 6.28<br>(11.70-38.37) | 10.50 ± 3.19<br>(5.33-16.93) | 51.81 ±12.02<br>(26.69-81.08)   | 9.41 ± 3.27<br>(3.92-16.26)  | 23.15 ± 6.81<br>(12.89-39.87)  | 5 ± 1<br>(3-7)           | 6 ± 1<br>(3-8)                | 3 ± 1<br>(2-4)                |
| VA-SG                                                                                          | 13.84 ± 2.63<br>(10.25-19.74) | 10.23 ± 2.12<br>(7.02-14.93)  | 7.28 ± 1.46<br>(5.04-10.95)  | 4.58 ± 1.33<br>(2.59-6.90)  | 7.84 ± 1.07<br>(5.98-10.06)  | 3.94 ± 0.91<br>(2.64-5.86) | 4.95 ± 0.95<br>(3.66-7.16) | 2.89 ± 0.25<br>(2.32-3.34) | 14.31 ± 1.75<br>(11.19-19.47) | 6.62 ± 1.16<br>(4.39-8.67)   | 4.19 ± 0.49<br>(3.23-5.23) | 1.36 ± 0.19<br>(1.03-1.78) | 11.97 ± 1.67<br>(8.92-14.99) | 20.21 ± 4.71<br>(12.00-29.19) | 6.44 ± 2.43<br>(3.95-15.33)  | 57.82 ±11.90<br>(43.39-88.92)   | 7.32 ± 2.75<br>(3.18-16.3)   | 19.66 ± 5.41<br>(12.60-32.98)  | 4 ± 1<br>(2-5)           | 4 ± 1<br>(3-6)                | 2 ± 1<br>(1-3)                |
| VK-BS                                                                                          | 4.94 ± 2.50<br>(3.54-9.83)    | 4.02 ± 2.10<br>(2.88-8.78)    | 3.02 ± 0.45<br>(2.18-3.96)   | 1.84 ± 0.30<br>(1.44-2.43)  | 3.71 ± 0.50<br>(2.98-4.90)   | 2.00 ± 0.34<br>(1.54-2.90) | 1.93 ± 0.23<br>(1.56-2.27) | 1.78 ± 0.32<br>(1.29-2.69) | 7.07 ± 0.57<br>(6.37-8.04)    | 3.12 ± 0.39<br>(2.50-3.78)   | 2.08 ± 0.26<br>(1.63-2.49) | 1.07 ± 0.21<br>(0.67-1.48) | 4.65 ± 1.15<br>(3.81-9.03)   | 3.71 ± 0.65<br>(2.62-4.73)    | 3.10 ± 0.78<br>(1.96-4.81)   | 18.96 ± 3.61<br>(13.60-25.51)   | 3.68 ± 1.41<br>(2.39-7.54)   | 5.58 ± 1.40<br>(3.87-9.14)     | 2 ± 1<br>(1-3)           | 3 ± 1<br>(2-4)                | 2 ± 0<br>(1-3)                |
| VK- NA                                                                                         | 5.99 ± 0.54<br>(4.86-6.62)    | 5.22 ± 0.35<br>(4.43-5.66)    | 3.48 ± 0.32<br>(2.90-4.10)   | 2.21 ± 0.41<br>(1.73-2.85)  | 4.29 ± 0.41<br>(3.47-4.79)   | 2.35 ± 0.23<br>(2.01-2.62) | 2.28 ± 0.23<br>(1.84-2.46) | 2.01 ± 0.24<br>(1.63-2.34) | 7.31 ± 0.60<br>(5.90-8.13)    | 2.98 ± 0.28<br>(2.44-3.40)   | 2.16 ± 0.31<br>(1.43-2.57) | 1.24 ± 0.14<br>(0.97-1.41) | 6.20 ± 1.05<br>(3.90-7.76)   | 7.67 ± 2.17<br>(4.40-12.21)   | 3.39 ± 0.74<br>(2.57-5.14)   | 24.57 ± 3.41<br>(20.81-32.78)   | 4.71 ± 1.54<br>(2.48-6.93)   | 10.07 ± 2.59<br>(6.15-14.88)   | 2 ± 0<br>(1-2)           | 4 ± 1<br>(3-5)                | 2 ± 1<br>(1-3)                |
| VK-NE                                                                                          | 6.29 ± 1.62<br>(4.13-8.42)    | 5.52 ± 1.20<br>(4.19-7.17)    | 4.18 ± 0.73<br>(2.80-4.98)   | 2.14 ± 0.45<br>(1.44-2.84)  | 4.61 ± 0.65<br>(3.59-5.57)   | 2.41 ± 0.49<br>(1.77-3.27) | 2.53 ± 0.37<br>(2.00-3.17) | 2.08 ± 0.35<br>(1.50-2.42) | 7.21 ± 0.66<br>(6.51-8.23)    | 3.21 ± 0.29<br>(2.83-3.48)   | 2.12 ± 0.19<br>(1.96-2.45) | 1.20 ± 0.10<br>(1.07-1.33) | 5.90 ± 1.32<br>(3.57-7.15)   | 7.95 ± 2.66<br>(3.69-11.15)   | 2.00 ± 0.40<br>(1.62-2.72)   | 16.52 ± 2.43<br>(13.81-19.56)   | 3.92 ± 1.39<br>(2.13-5.94)   | 9.05 ± 3.14<br>(3.82-13.37)    | 0 ± 0<br>(0-0)           | 4 ± 1<br>(3-5)                | 2 ± 0<br>(2-2)                |
| VT-PG                                                                                          | 22.02 ± 2.24<br>(16.58-25.44) | 17.18 ± 2.07<br>(12.97-20.48) | 12.56 ± 1.31<br>(9.81-14.70) | 8.30 ± 1.43<br>(6.28-11.11) | 11.55 ± 1.04<br>(9.55-13.09) | 6.87 ± 1.07<br>(5.2-8.60)  | 8.36 ± 0.90<br>(6.46-9.56) | 3.19 ± 0.32<br>(2.45-3.91) | 17.87 ± 1.58<br>(14.71-21.02) | 10.76 ± 1.32<br>(8.41-12.98) | 4.70 ± 0.47<br>(3.86-5.56) | 1.70 ± 0.33<br>(1.21-2.46) | 13.57 ± 1.85<br>(9.49-18.67) | 28.44 ± 5.10<br>(18.08-36.43) | 12.43 ± 2.58<br>(8.37-18.76) | 79.09 ± 24.17<br>(35.59-116.85) | 11.04 ± 3.62<br>(4.25-17.70) | 24.23 ± 5.24<br>(13.33-34.78)  | 6 ± 1<br>(4-7)           | 5 ± 1<br>(3-8)                | 2 ± 1<br>(1-3)                |

| SM S2b - Categorical characters (except FL-LE_PO, not evaluable) |                 |                                                             |                                                                       |                                                 |                  |                                                                 |                                      |                                        |                                               |                                            |
|------------------------------------------------------------------|-----------------|-------------------------------------------------------------|-----------------------------------------------------------------------|-------------------------------------------------|------------------|-----------------------------------------------------------------|--------------------------------------|----------------------------------------|-----------------------------------------------|--------------------------------------------|
|                                                                  | Pollen magazine | Lower sepal appendage                                       | Lower sepal shape                                                     | Stigmatic chamber entrance (front view)         | Stylar dark spot | Stylar flap size                                                | Lamina apex                          | Lamina margin                          | Stipule midlobe margin                        | Stipule shape                              |
| Code                                                             | PO_MA           | SE_AP                                                       | SE_SH                                                                 | ST_CH                                           | ST_DS            | STY                                                             | LA_AP                                | LA_ED                                  | ST_ED                                         | ST_SH                                      |
| VA-ST                                                            | Open<br>100%    | Irregularly sinuate<br>100%                                 | Narrowly lanceolate-acuminate<br>88.89%<br>Ovate-lanceolate<br>11.11% | In front<br>100%                                | Absent<br>100%   | Small and scarcely protruding<br>100%                           | Rounded<br>100%                      | Crenate<br>100%                        | Entire<br>77.70%<br>Crenate-dentate<br>22.30% | Pinnatifid<br>88.89%<br>Digitate<br>11.11% |
| VA-LA                                                            | Open<br>100%    | Irregularly sinuate<br>100%                                 | Narrowly lanceolate-acuminate<br>100%                                 | In front<br>100%                                | Absent<br>100%   | Small and scarcely protruding<br>100%                           | Acute<br>55.50%<br>Rounded<br>44.50% | Dentate<br>100%                        | Entire<br>94.44%<br>Crenate-dentate<br>5.56%  | Pinnatifid<br>100%                         |
| VA-SCI                                                           | Open<br>100%    | Irregularly sinuate<br>100%                                 | Narrowly lanceolate-acuminate<br>100%                                 | In front<br>100%                                | Absent<br>100%   | Small and scarcely protruding<br>100%                           | Rounded<br>93.30%<br>Acute<br>6.70%  | Crenate<br>100%                        | Crenate-dentate<br>100%                       | Pinnatifid<br>66.67%<br>Digitate<br>33.33% |
| VA-TA                                                            | Open<br>100%    | Irregularly sinuate<br>88.46%<br>coarsely dentate<br>11.54% | Narrowly lanceolate-acuminate<br>100%                                 | Lightly oblique<br>100%                         | Absent<br>100%   | Small and scarcely protruding<br>100%                           | Rounded<br>92.30%<br>Acute<br>7.70%  | Crenate<br>76.90%<br>Dentate<br>23.10% | Crenate-dentate<br>82.60%<br>Entire<br>17.40% | Pinnatifid<br>100%                         |
| VA-CE                                                            | Open<br>100%    | Irregularly sinuate<br>73.68%<br>coarsely dentate<br>26.32% | Narrowly lanceolate-acuminate<br>100%                                 | In front<br>100%                                | Absent<br>100%   | Small and scarcely protruding<br>100%                           | Rounded<br>100%                      | Crenate<br>95.00%<br>Dentate<br>5.00%  | Crenate-dentate<br>89.40%<br>Entire<br>10.60% | Digitate<br>89,5%<br>Pinnatifid<br>10,5%   |
| VA-B/1                                                           | Closed<br>100%  | coarsely dentate<br>100%                                    | Narrowly lanceolate-acuminate<br>100%                                 | In front<br>50.00%<br>Lightly oblique<br>50.00% | Present<br>100%  | Small and scarcely protruding<br>95.00%<br>Conspicuous<br>5.00% | Acute<br>60.00%<br>Rounded<br>40.00% | Dentate<br>50.00%<br>Crenate<br>50.00% | Crenate-dentate<br>80.00%<br>Entire<br>20.00% | Digitate<br>100%                           |
| VA-B/2                                                           | Closed<br>100%  | coarsely dentate<br>100%                                    | Narrowly lanceolate-acuminate<br>100%                                 | Lightly oblique<br>71.43%<br>In front<br>28.57% | Present<br>100%  | Small and scarcely protruding<br>92.86%<br>Conspicuous<br>7.14% | Rounded<br>60.70%<br>Acute<br>39.30% | Dentate<br>53,57%<br>Crenate<br>46.43% | Crenate-dentate<br>100%                       | Digitate<br>96.43%<br>Pinnatifid<br>3.57%  |
| VA-BS                                                            | Closed<br>100%  | coarsely dentate<br>100%                                    | Narrowly lanceolate-acuminate<br>100%                                 | In front<br>50%<br>Lightly oblique<br>50%       | Present<br>100%  | Small and scarcely protruding<br>95.84%<br>Conspicuous<br>4.16% | Rounded<br>66.60%<br>Acute<br>33.40% | Crenate<br>66.60%<br>Dentate<br>33,40% | Crenate-dentate<br>100%                       | Digitate<br>100%                           |

|        |                                   |                                                             |                                       |                                                 |                                      |                                                                 |                                      |                                        |                                               |                                            |
|--------|-----------------------------------|-------------------------------------------------------------|---------------------------------------|-------------------------------------------------|--------------------------------------|-----------------------------------------------------------------|--------------------------------------|----------------------------------------|-----------------------------------------------|--------------------------------------------|
| VA-AZ  | Closed<br>92.59%<br>Open<br>7.41% | coarsely dentate<br>100%                                    | Narrowly lanceolate-acuminate<br>100% | In front<br>96.30%<br>Lightly oblique<br>3.70%  | Present<br>96.35%<br>Absent<br>3.65% | Small and scarcely protruding<br>100%                           | Acute<br>100%                        | Dentate<br>100%                        | Crenate-dentate<br>92.59%<br>Entire<br>7.41%  | Digitate<br>100%                           |
| VA-SG  | Closed<br>100%                    | coarsely dentate<br>100%                                    | Narrowly lanceolate-acuminate<br>100% | Lightly oblique<br>81.82%<br>In front<br>18.18% | Present<br>91.32%<br>Absent<br>8.68% | Small and scarcely protruding<br>95.46%<br>Conspicuous<br>4.54% | Acute<br>100%                        | Dentate<br>100%                        | Crenate-dentate<br>59.00%<br>Entire<br>41.00% | Digitate<br>90.91%<br>Pinnatifid<br>9.09%  |
| VK-BS  | Open<br>100%                      | Entire<br>84.21%<br>Irregularly sinuate<br>15.79%           | Ovate-lanceolate<br>100%              | In front<br>100%                                | Absent<br>100%                       | Absent<br>100%                                                  | Rounded<br>100%                      | Crenate<br>100%                        | Crenate-dentate<br>63.15%<br>Entire<br>36.85% | Digitate<br>100%                           |
| VK- NA | Open<br>100%                      | Irregularly sinuate<br>90.00%<br>Entire<br>10.00%           | Ovate-lanceolate<br>100%              | In front<br>100%                                | Absent<br>100%                       | Absent<br>100%                                                  | Rounded<br>100%                      | Crenate<br>100%                        | Entire<br>50.00%<br>Crenate-dentate<br>50.00% | Pinnatifid<br>100%                         |
| VK-NE  | Open<br>100%                      | Irregularly sinuate<br>83.33%<br>Entire<br>16.67%           | Ovate-lanceolate<br>100%              | In front<br>100%                                | Absent<br>100%                       | Absent<br>100%                                                  | Rounded<br>100%                      | Entire<br>100%                         | Entire<br>100%                                | Pinnatifid<br>100%                         |
| VT-PG  | Closed<br>100%                    | Irregularly sinuate<br>77.27%<br>coarsely dentate<br>22.73% | Narrowly lanceolate-acuminate<br>100% | Upward<br>100%                                  | Present<br>100%                      | Conspicuous<br>100%                                             | Acute<br>77.20%<br>Rounded<br>22.80% | Dentate<br>77.20%<br>Crenate<br>22.80% | Crenate-dentate<br>54.54%<br>Entire<br>45.46% | Digitate<br>77.27%<br>Pinnatifid<br>22.73% |

| SM S2c - Indices (as mean ± SD, with minimum-maximum values in brackets) |                            |                             |                               |                                           |                             |                                      |                            |                            |                            |                             |
|--------------------------------------------------------------------------|----------------------------|-----------------------------|-------------------------------|-------------------------------------------|-----------------------------|--------------------------------------|----------------------------|----------------------------|----------------------------|-----------------------------|
|                                                                          | Corolla<br>length/width    | Upper petal<br>length/width | Lateral petal<br>length/width | Lateral petal<br>lower half/upper<br>half | Lower petal<br>length/width | Lower<br>petal/lower sepal<br>length | Spur<br>length/width       | Lamina<br>length/width     | Lamina/petiole<br>length   | Peduncle/leaf<br>length     |
| Code                                                                     | CO_LE/WI                   | UPP_LE/WI                   | LAP_LE/WI                     | LOHA/UPHA                                 | LOP_LE/WI                   | LOP/SE_LE                            | SP_LE/WI                   | LA_LE/WI                   | LA/PET_LE                  | PED/LE_LE                   |
| VA-ST                                                                    | 1.21 ± 0.19<br>(0.92-1.59) | 1.78 ± 0.14<br>(1.49-2.00)  | 1.95 ± 0.10<br>(1.80-2.18)    | 0.92 ± 0.10<br>(0.75-1.09)                | 2.48 ± 0.13<br>(2.24-2.74)  | 1.49 ± 0.20<br>(1.16-1.93)           | 1.67 ± 0.16<br>(1.50-2.06) | 1.72 ± 0.67<br>(1.05-2.93) | 1.34 ± 0.32<br>(0.84-1.94) | 2.67 ± 1.10<br>(1.50-6.32)  |
| VA-LA                                                                    | 1.23 ± 0.21<br>(1.02-1.74) | 1.91 ± 0.15<br>(1.68-2.19)  | 2.11 ± 0.19<br>(1.82-2.46)    | 0.79 ± 0.10<br>(0.64-1.02)                | 2.44 ± 0.15<br>(2.19-2.75)  | 1.32 ± 0.14<br>(1.07-1.53)           | 1.63 ± 0.15<br>(1.40-1.95) | 3.08 ± 1.36<br>(1.55-5.64) | 2.11 ± 0.88<br>(1.35-4.87) | 2.94 ± 1.33<br>(1.06-5.68)  |
| VA-SCI                                                                   | 1.10 ± 0.11<br>(0.90-1.28) | 1.81 ± 0.16<br>(1.64-2.12)  | 2.03 ± 0.15<br>(1.75-2.21)    | 0.83 ± 0.16<br>(0.58-1.23)                | 2.46 ± 0.16<br>(2.15-2.73)  | 1.36 ± 0.24<br>(1.03-1.79)           | 1.59 ± 0.16<br>(1.34-1.93) | 1.50 ± 0.47<br>(0.91-2.36) | 1.40 ± 0.27<br>(0.83-2.11) | 2.70 ± 0.88<br>(1.48-4.50)  |
| VA-TA                                                                    | 1.29 ± 0.11<br>(1.07-1.52) | 1.89 ± 0.12<br>(1.68-2.19)  | 2.03 ± 0.11<br>(1.88-2.29)    | 0.90 ± 0.14<br>(0.65-1.19)                | 2.44 ± 0.19<br>(1.95-2.76)  | 1.35 ± 0.19<br>(0.98-1.67)           | 1.66 ± 0.10<br>(1.49-1.86) | 1.78 ± 0.61<br>(1.11-3.17) | 1.40 ± 0.33<br>(0.79-2.16) | 2.56 ± 0.65<br>(1.28-3.72)  |
| VA-CE                                                                    | 1.34 ± 0.15<br>(1.11-1.69) | 1.89 ± 0.14<br>(1.52-2.10)  | 2.03 ± 0.15<br>(1.72-2.30)    | 0.97 ± 0.14<br>(0.81-1.40)                | 2.53± 0.15<br>(2.32-2.95)   | 1.34 ± 0.15<br>(1.16-1.82)           | 1.66 ± 0.11<br>(1.38-1.87) | 1.37 ± 0.33<br>(0.98-2.09) | 1.18 ± 0.24<br>(0.85-1.76) | 2.28 ± 0.62<br>(1.28-3.72)  |
| VA-B/1                                                                   | 1.39 ± 0.18<br>(1.02-1.64) | 1.61 ± 0.15<br>(1.39-1.91)  | 1.93 ± 0.24<br>(1.40-2.26)    | 0.52 ± 0.14<br>(0.32-0.78)                | 2.00 ± 0.32<br>(1.51-2.58)  | 1.25 ± 0.12<br>(1.07-1.47)           | 2.51 ± 0.34<br>(1.92-3.09) | 2.49 ± 0.89<br>(1.32-4.88) | 3.60 ± 1.75<br>(1.29-7.08) | 2.64 ± 0.94<br>(1.62-5.84)  |
| VA-B/2                                                                   | 1.34 ± 0.14<br>(1.16-1.64) | 1.39 ± 0.16<br>(1.09-1.81)  | 1.71 ± 0.14<br>(1.43-2.10)    | 0.49 ± 0.06<br>(0.41-0.65)                | 1.76 ± 0.12<br>(1.50-2.08)  | 1.45 ± 0.12<br>(1.26-1.71)           | 2.09 ± 0.19<br>(1.72-2.52) | 2.02 ± 0.67<br>(1.02-3.69) | 1.89 ± 0.92<br>(0.89-4.44) | 2.27 ± 0.63<br>(1.26-3.67)  |
| VA-BS                                                                    | 1.43 ± 0.20<br>(1.11-1.77) | 1.62 ± 0.11<br>(1.41-1.83)  | 2.07 ± 0.28<br>(1.56-2.51)    | 0.57 ± 0.15<br>(0.33-0.80)                | 2.02 ± 0.38<br>(1.45-2.58)  | 1.34 ± 0.15<br>(1.11-1.62)           | 2.15 ± 0.20<br>(1.72-2.44) | 2.34 ± 0.72<br>(1.32-3.87) | 2.81 ± 1.00<br>(1.58-4.89) | 1.80 ± 0.29<br>(1.38-2.32)  |
| VA-AZ                                                                    | 1.36 ± 0.09<br>(1.23-1.59) | 1.79 ± 0.17<br>(1.49-2.23)  | 2.09 ± 0.12<br>(1.81-2.41)    | 0.71 ± 0.11<br>(0.53-0.92)                | 2.42 ± 0.17<br>(2.09-2.78)  | 0.97 ± 0.27<br>(0.51-1.31)           | 2.13 ± 0.25<br>(1.77-2.73) | 1.98 ± 0.54<br>(1.20-3.03) | 2.20 ± 0.43<br>(1.18-3.13) | 1.89 ± 0.67<br>(1.15-3.65)  |
| VA-SG                                                                    | 1.36 ± 0.09<br>(1.23-1.52) | 1.65 ± 0.23<br>(1.32-2.12)  | 2.06 ± 0.24<br>(1.69-2.63)    | 0.60 ± 0.10<br>(0.41-0.74)                | 2.22 ± 0.27<br>(1.75-2.89)  | 1.21 ± 0.18<br>(0.89-1.72)           | 3.10 ± 0.29<br>(2.64-3.73) | 3.32 ± 0.83<br>(1.70-4.55) | 2.97 ± 0.95<br>(1.60-6.19) | 2.18 ± 0.54<br>(1.35-3.59)  |
| VK-BS                                                                    | 1.23 ± 0.10<br>(1.04-1.42) | 1.66 ± 0.20<br>(1.34-1.94)  | 1.87 ± 0.19<br>(1.38-2.18)    | 0.93 ± 0.12<br>(0.74-1.22)                | 2.28 ± 0.16<br>(1.88-2.55)  | 1.57 ± 0.23<br>(0.72-1.83)           | 1.99 ± 0.25<br>(1.52-2.61) | 1.24 ± 0.26<br>(0.96-1.88) | 1.08 ± 0.24<br>(0.63-1.55) | 2.67 ± 0.67<br>(1.64-4.22)  |
| VK- NA                                                                   | 1.15 ± 0.06<br>(1.06-1.25) | 1.60 ± 0.18<br>(1.28-1.90)  | 1.83 ± 0.11<br>(1.69-2.06)    | 0.88 ± 0.09<br>(0.69-1.05)                | 2.46 ± 0.14<br>(2.18-2.68)  | 1.20 ± 0.16<br>(0.93-1.51)           | 1.74 ± 0.12<br>(1.47-1.89) | 2.30 ± 0.59<br>(1.43-3.08) | 1.68 ± 0.34<br>(1.20-2.33) | 2.10 ± 0..50<br>(1.48-3.02) |
| VK-NE                                                                    | 1.14 ± 0.12<br>(0.99-1.28) | 1.96 ± 0.13<br>(1.75-2.11)  | 1.93 ± 0.14<br>(1.70-2.08)    | 0.82 ± 0.12<br>(0.72-1.04)                | 2.25 ± 0.07<br>(2.18-2.36)  | 1.28 ± 0.32<br>(0.99-1.82)           | 1.77 ± 0.12<br>(1.62-1.96) | 3.94 ± 1.00<br>(2.28-5.31) | 2.04 ± 0.25<br>(2.47-1.73) | 1.50 ± 0.45<br>(1.14-2.37)  |
| VT-PG                                                                    | 1.29 ± 0.08<br>(1.16-1.47) | 1.54 ± 0.18<br>(1.25-1.97)  | 1.70 ± 0.16<br>(1.48-2.03)    | 0.39 ± 0.05<br>(0.31-0.48)                | 1.67 ± 0.14<br>(1.50-2.01)  | 1.33 ± 0.14<br>(1.02-1.59)           | 2.84 ± 0.46<br>(2.27-3.82) | 2.35 ± 0.53<br>(1.60-3.55) | 2.87 ± 1.22<br>(1.58-7.00) | 2.01 ± 0.60<br>(1.04-3.56)  |
